# Supplementary material for: In vivo evidence for cooperation of Mia40 and Erv1 in the oxidation of mitochondrial proteins
Source: PubMed Central journal article supplement — Mol Biol Cell. 2012 Oct 15;23(20):3957–69. doi: 10.1091/mbc.E12-05-0358 (PMC3469512; doi:10.1091/mbc.e12-05-0358), 2012-10-15
Supplement: supp_E12-05-0358_CombinedSupMats.pdf [file supp_E12-05-0358_CombinedSupMats.pdf]

## Supplemental Materials

Böttinger et al.

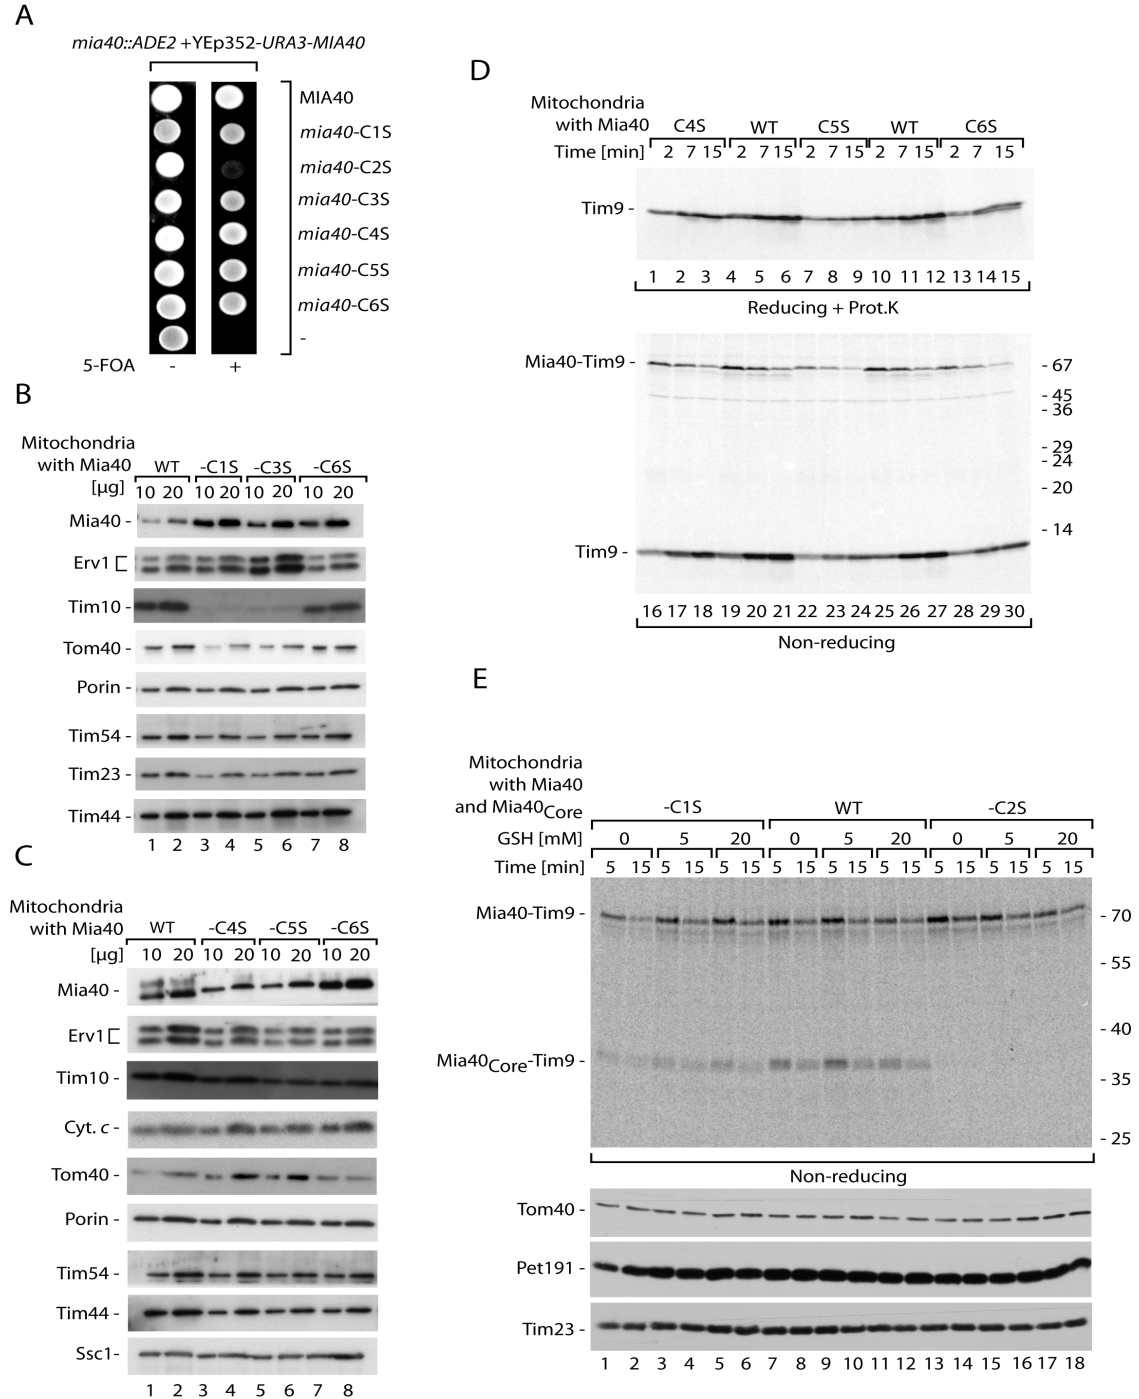

Fig. S1 Böttinger et al.

**SUPPLEMENTAL FIGURE 1:** Characterization of the single cysteine mutants of Mia40.

(A) Generation of yeast strains harboring cysteine residue mutants of Mia40. The growth of yeast before and after removal of wild-type Mia40 by 5-fluoroorotic acid (5-FOA) treatment is shown. (B) The steady-state protein levels of mitochondria with wild-type Mia40, Mia40-C1S, Mia40-C3S, and Mia40-C6S ( $\rho^0$  versions). (C) The steady-state protein levels of mitochondria with wild-type Mia40, Mia40-C4S, Mia40-C5S, and Mia40-C6S. (B-C) Samples were analyzed by reducing SDS electrophoresis and immunodecoration with different antisera. (D)  $^{35}\text{S}$ -labeled Tim9 was imported into mitochondria with Mia40, Mia40-C4S, Mia40-C5S or Mia40-C6S. Samples were treated with Prot. K and analyzed by SDS electrophoresis as indicated. E)  $^{35}\text{S}$ -labeled Tim9 was imported in the presence of increasing concentrations of GSH into mitochondria isolated from wild-type cells co-producing Mia40<sub>Core</sub> (WT), Mia40<sub>Core</sub>-C1S or Mia40<sub>Core</sub>-C2S. Samples were analyzed by SDS electrophoresis followed by autoradiography or by immunodecoration with antisera against control proteins.

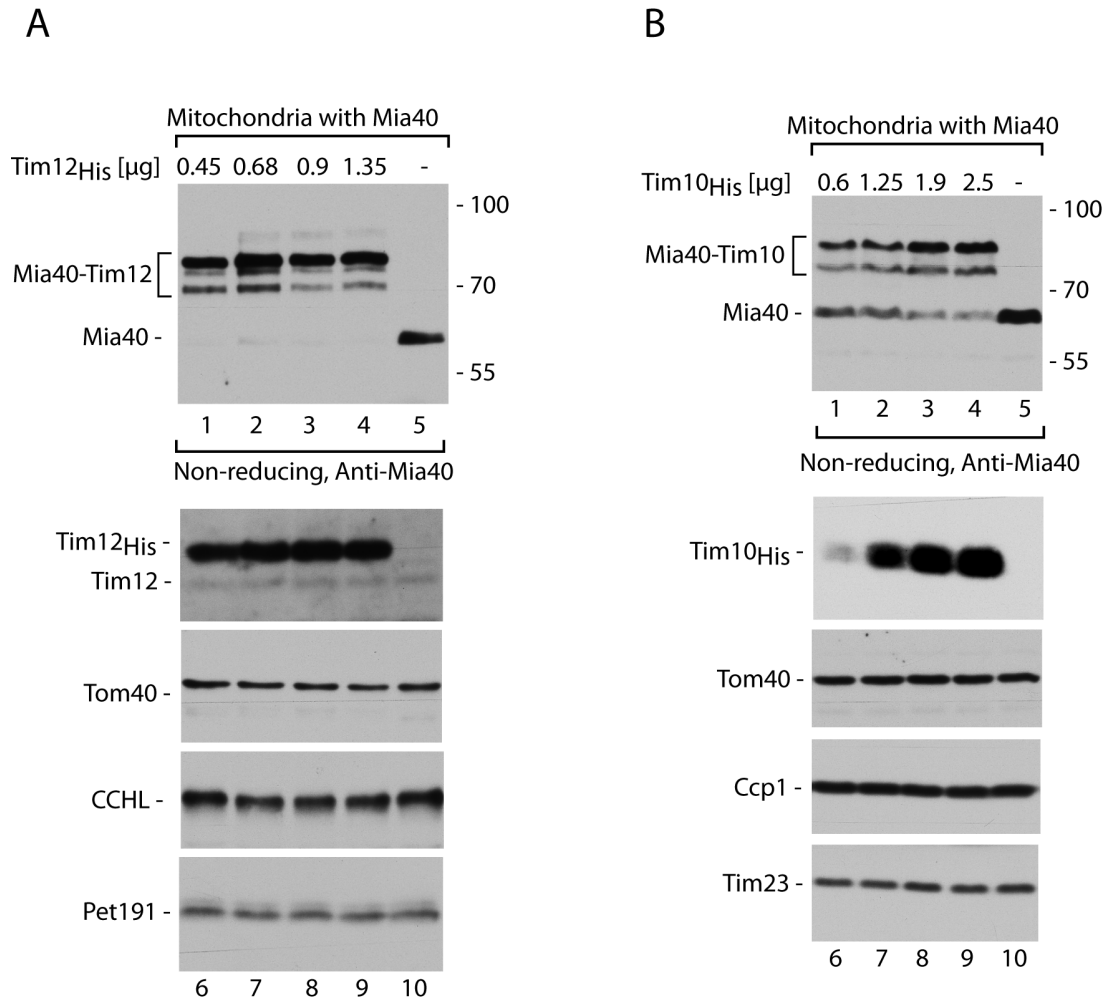

Fig. S2 Bottinger et al.

**SUPPLEMENTAL FIGURE 2:** Mia40 is saturated by imported Tim12<sub>His</sub> and Tim10<sub>His</sub> precursor proteins. (A) Tim12<sub>His</sub> was imported for 10 min at 25°C into mitochondria isolated from wild-type cells. (B) Tim10<sub>His</sub> was imported for 10 min at 25°C into mitochondria isolated from wild-type cells. (A and B) Samples were analyzed by SDS electrophoresis and immunodecoration with antisera against Mia40 and control proteins.

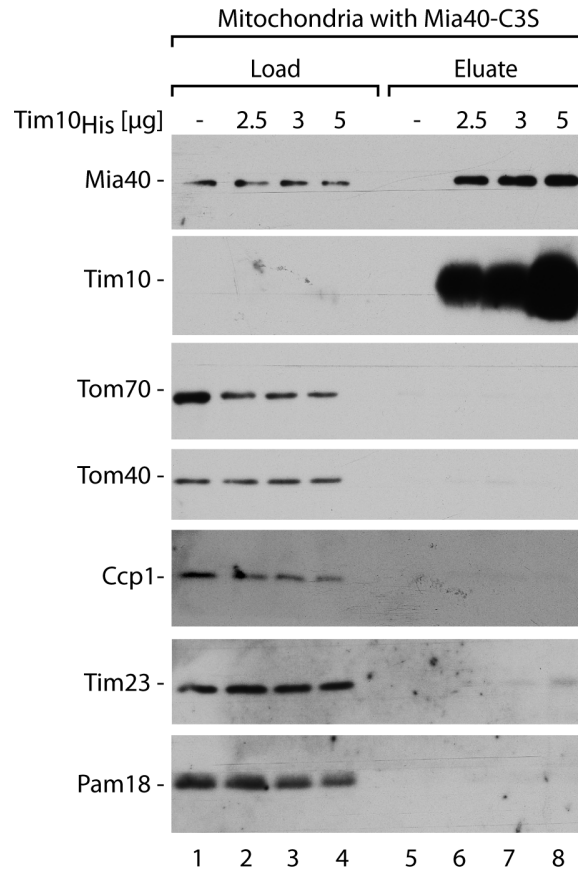

Fig. S3 Bottinger et al.

**SUPPLEMENTAL FIGURE 3:** Recombinant Tim10<sub>His</sub> saturates Mia40-C3S. Ni-NTA agarose affinity purification was performed upon import of increasing amounts of Tim10<sub>His</sub> followed by solubilization with digitonin. Load, 2%; Eluate, 100%. Samples were analyzed by reducing SDS electrophoresis and immunodecoration with different antisera.

A

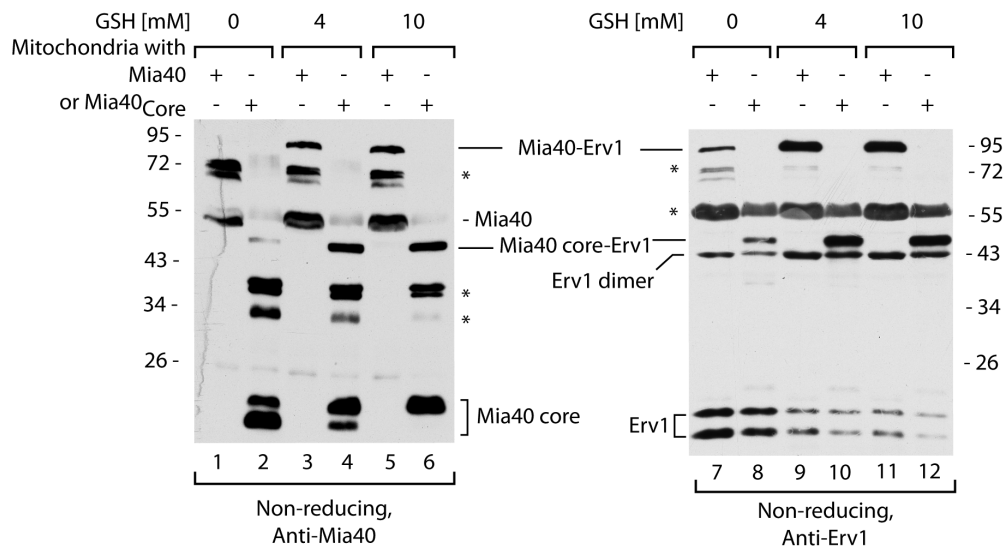

B

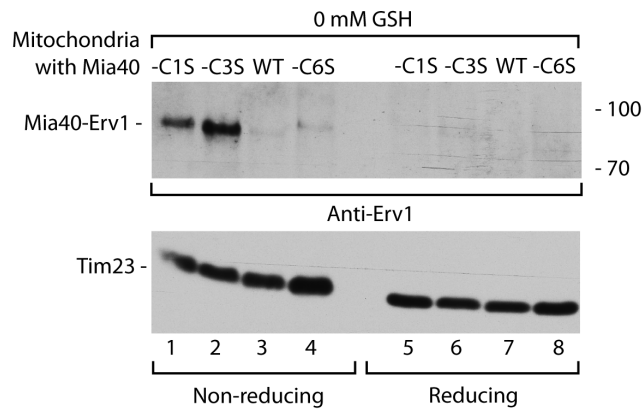

C

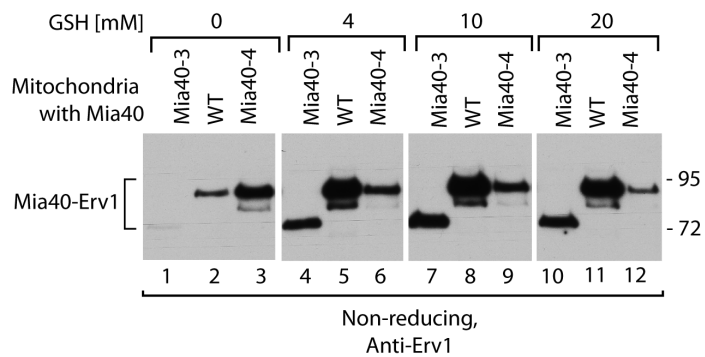

Fig. S4 Bottinger et al.

**SUPPLEMENTAL FIGURE 4:** Characterization of Mia40-Erv1 complex formation. (A) Mitochondria with Mia40 or Mia40<sub>Core</sub> were subjected to GSH treatment. (B) Mitochondria isolated from yeast with Mia40 (WT), Mia40-C1S, Mia40-C3S or Mia40-C6S ( $\rho^0$  versions) were analyzed by non-reducing or reducing SDS electrophoresis. (C) Mitochondria with Mia40 (WT), Mia40-3 or Mia40-4 were subjected to GSH treatment. (A-C) Samples were analyzed by SDS electrophoresis and immunodecoration with different antisera. Stars indicate non-specific bands or non-identified species.

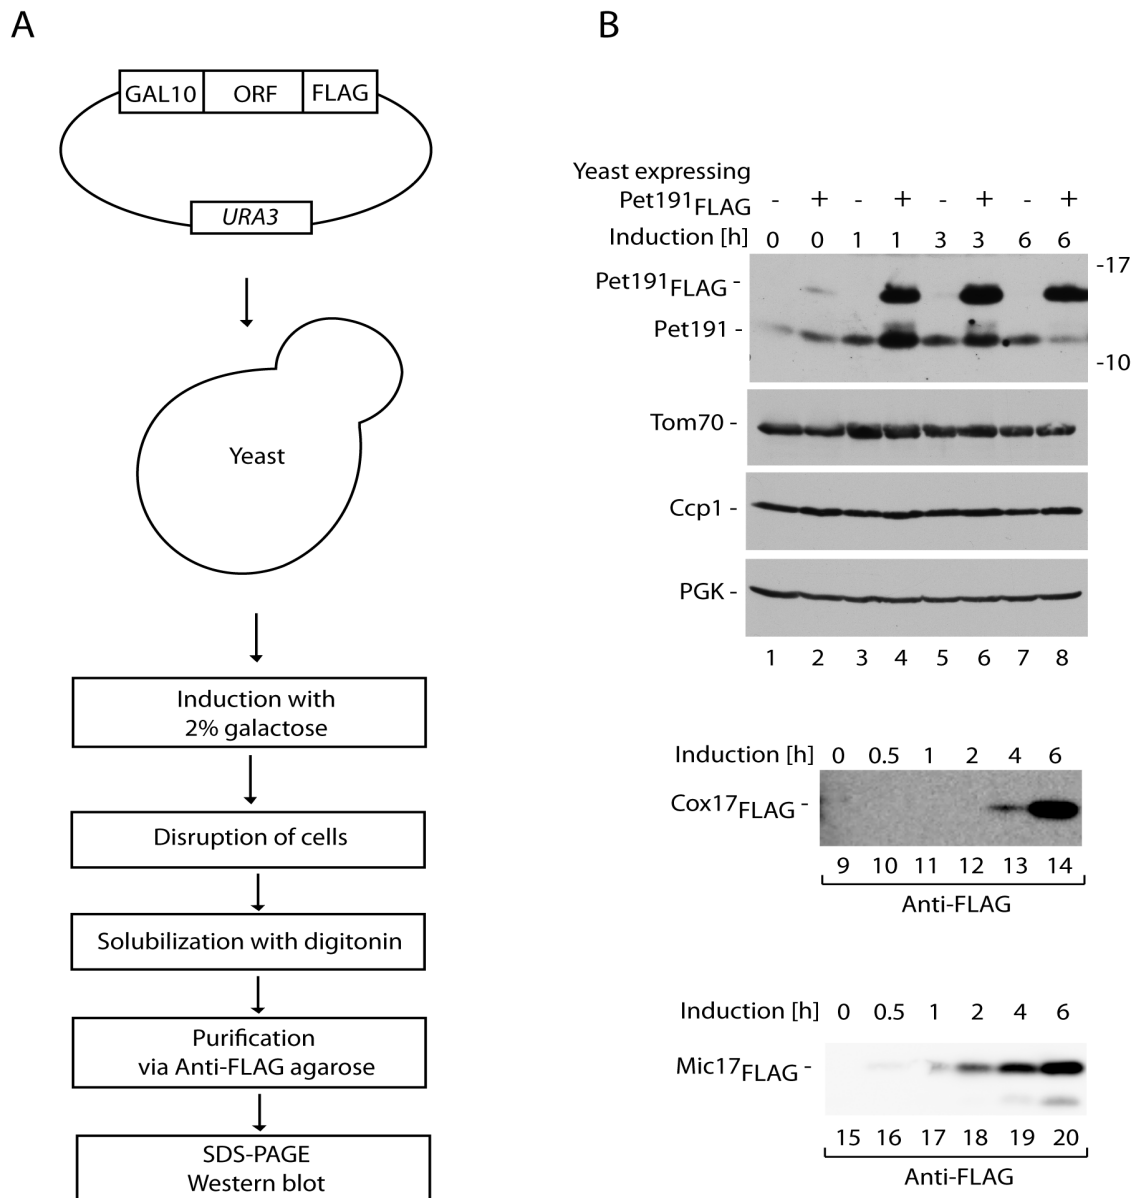

Fig. S5 Bottinger et al.

**SUPPLEMENTAL FIGURE 5:** Establishing the conditions to express FLAG variants of MIA substrates. (A) Schematic representation of the *in vivo* scheme employed for the purification of FLAG-fusion proteins. (B) Total protein extracts of yeast producing Pet191<sub>FLAG</sub>, Cox17<sub>FLAG</sub> or Mic17<sub>FLAG</sub> were analyzed by reducing SDS electrophoresis and immunodecoration with different antisera after indicated induction times.
